# Supplementary material for: Orexins contribute to restraint stress-induced cocaine relapse by endocannabinoid-mediated disinhibition of dopaminergic neurons
Source: PubMed Central journal article supplement (PMC4961842; doi:10.1038/ncomms12199), 2016-07-22
Supplement: ncomms12199-s1.pdf [file ncomms12199-s1.pdf]

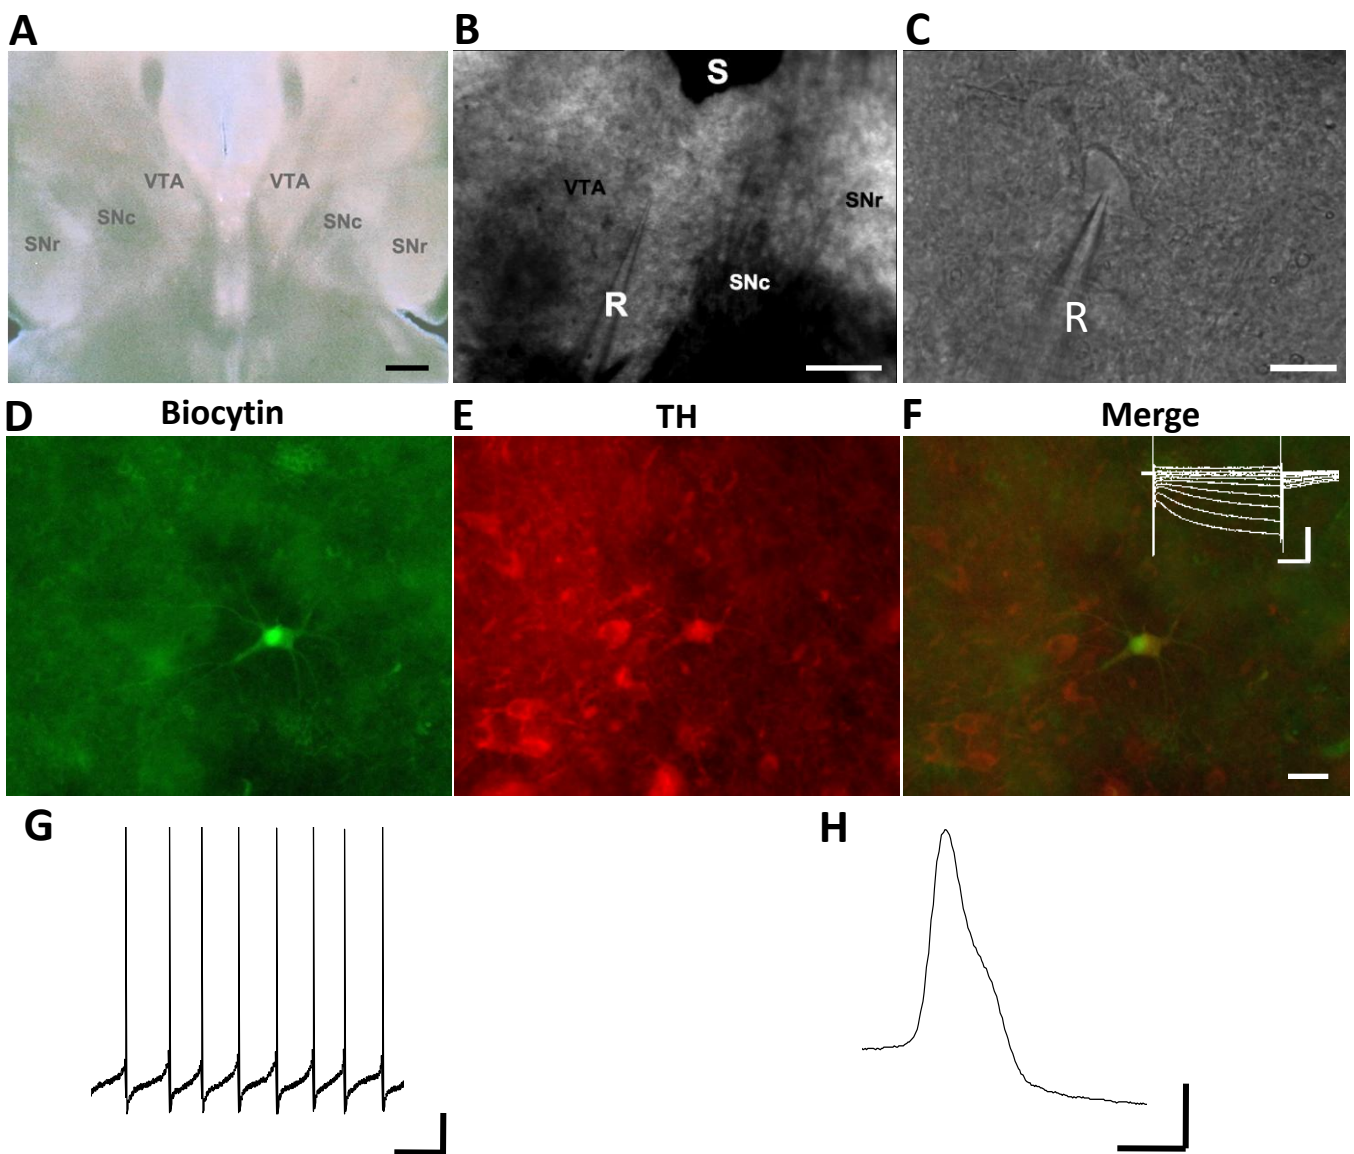

**Supplemental Figure 1. Identification of dopaminergic neurons in VTA slices.** (a) Micrographs demonstrate the location of the VTA with the landmark of the substantia nigra compacta (SNc) in a brain slice. Scale bar, 500  $\mu\text{m}$ , (b) where the stimulating electrode (S) was placed rostral to the recording microelectrode (R). Scale bar, 200  $\mu\text{m}$ , (c) when recording from a VTA neuron. Scale bar, 25  $\mu\text{m}$ . (d) Micrographs of a recorded VTA neuron filled with biocytin and (e) expressing tyrosine hydroxylase (TH), and (f) a superimposed image. Scale bar, 40  $\mu\text{m}$ . Inset in (f): Membrane currents elicited by voltage steps from -70 mV to -50 to -140 mV, in -10 mV-increments in this dopaminergic neuron. Scale bars, 200 ms and 400 pA. Besides, (g) dopaminergic neurons have lower basal firing rates. Scale bars, 1s and 20 mV, (h) wider action potentials, Scale bars, 5 ms and 20 mV. and stronger firing adaptation than GABA neurons. Note that robust  $I_h$  currents were elicited by hyperpolarizing voltage steps. VTA: Ventral Tegmental Area, SNc: Substantia Nigra compacta, SNr: Substantia Nigra reticulata.

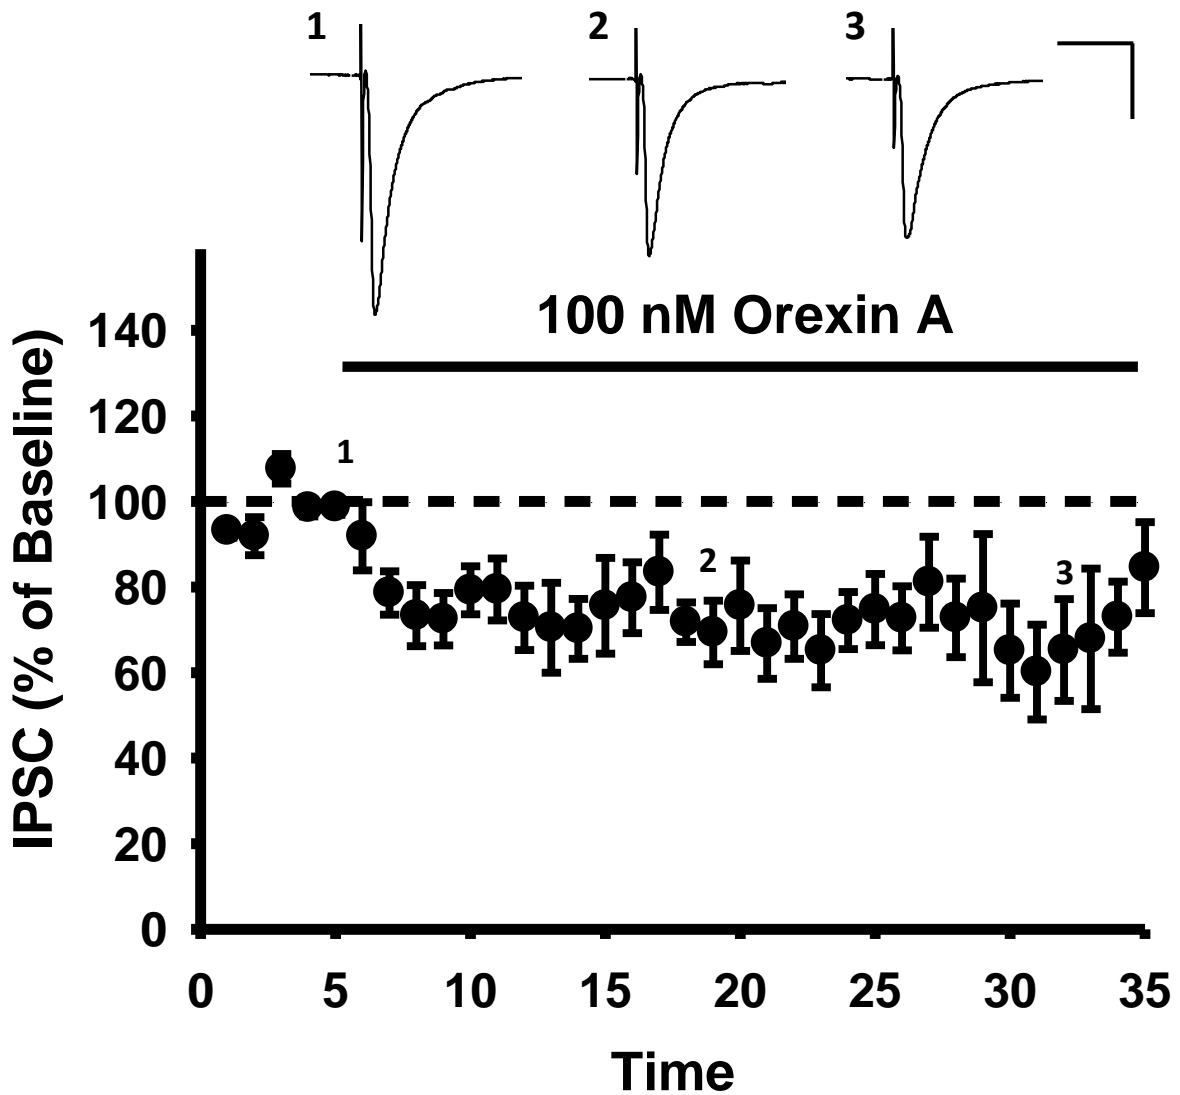

**Supplemental Figure 2. Long term treatment with orexin A did not cause receptor desensitization.** Time courses of effects of orexin A (100 nM) on IPSCs (n=4). Upper panels are the representative IPSC traces taken at time point 1, 2 and 3, respectively, from a neuron. Scale bars, 50 ms and 200 pA.

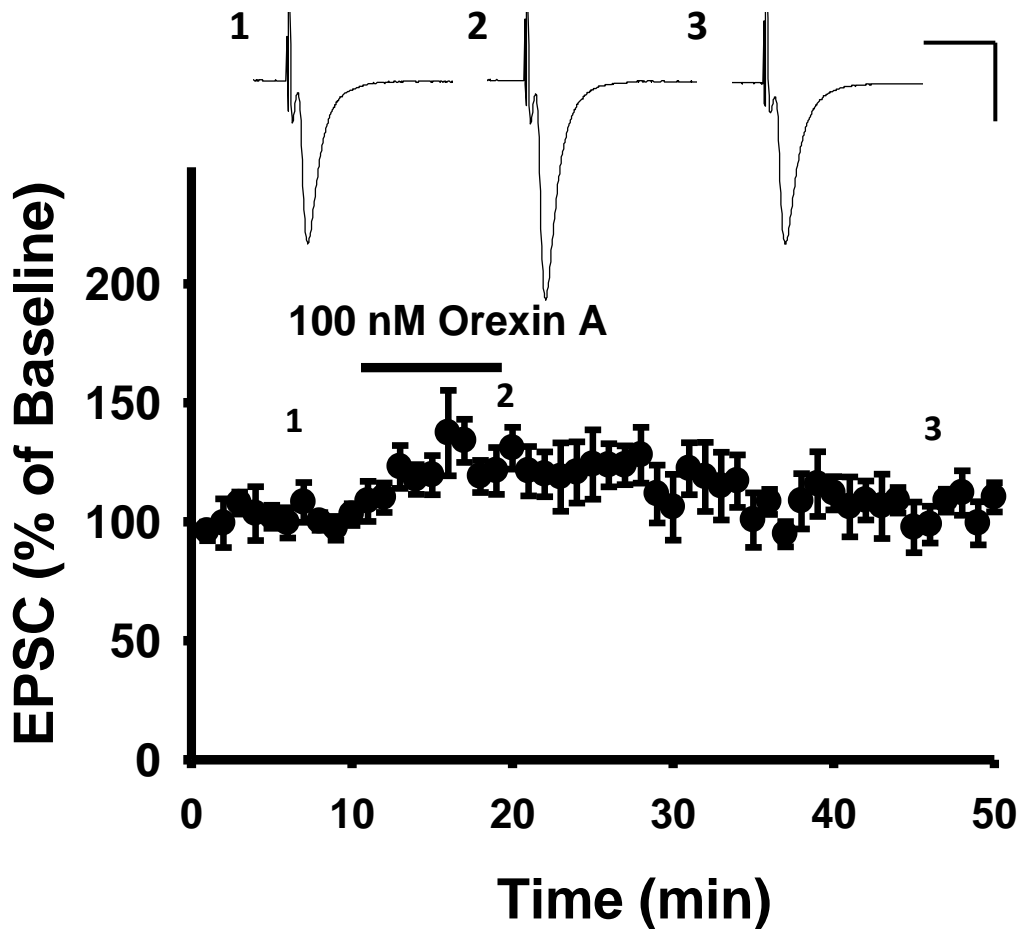

**Supplemental Figure 3. Orexin A did not depress evoked EPSCs**  
Time courses of effects of orexin A (100 nM) on EPSCs (n=5). Upper panels are the representative IPSC traces taken at time point 1, 2 and 3, respectively, from a neuron. Scale bars, 50 ms and 200 pA.

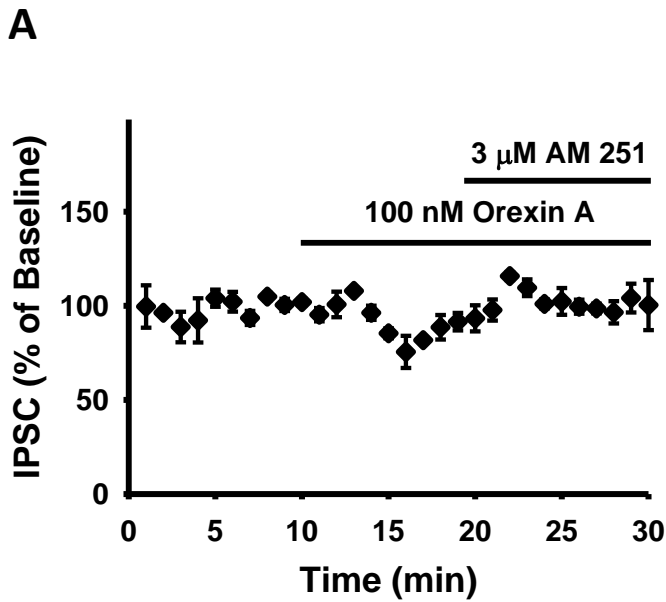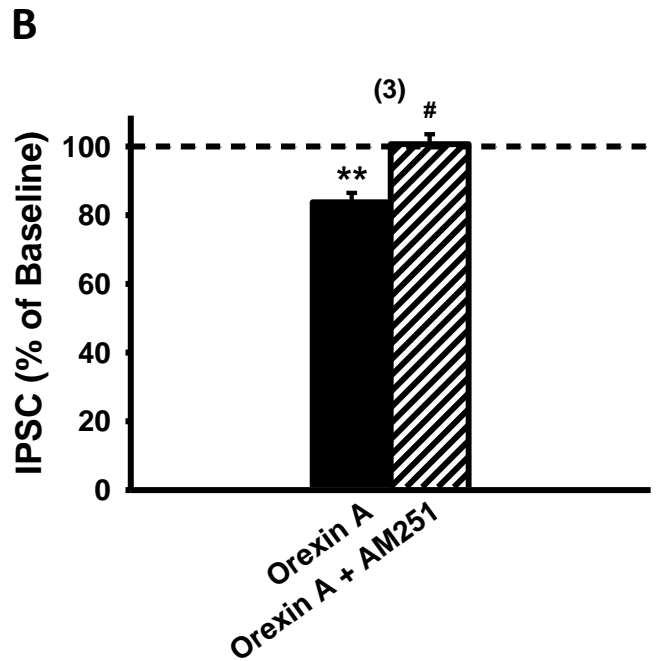

**Supplemental Figure 4. Orexin A depressed IPSCs in dopaminergic neurons of mouse VTA slices in a manner reversed by a CB1R antagonist.** (a) The time course of the effect of orexin A (100 nM) on the IPSC amplitude before and after treatment with AM 251 (3  $\mu$ M). (b) The effect of orexin A (n=3) (black bar) alone or in combination with AM 251 (right slashed bar) on the IPSC amplitude. Data analysis and presentation are the same as Fig. 1. \*\* $p < 0.01$  (one sample  $t$  test); # $p < 0.05$  vs. orexin A alone (paired  $t$  test)

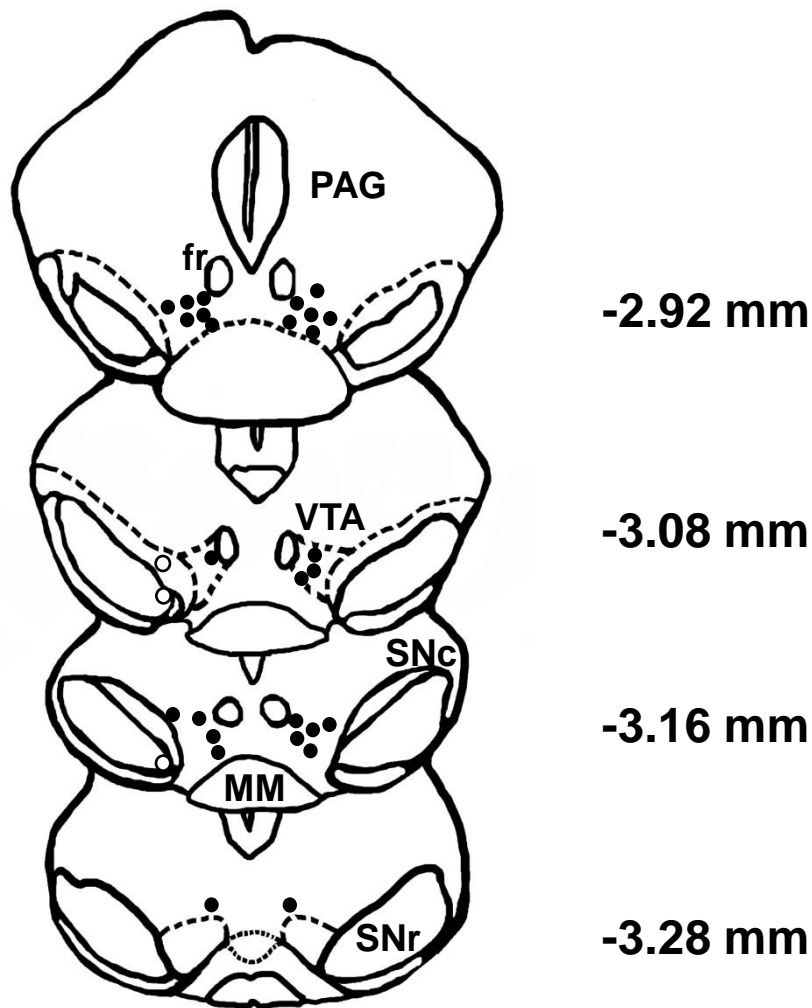

**Supplemental Figure 5. Reconstructed bilateral injection sites in the VTA are shown in drawn midbrain coronal sections.** Distance from bregma is shown to the right of each section (in millimeters)<sup>1</sup>. Injection sites from mice used in the stress induced reinstatement experiment, on site (closed circles); off site (open circles). fr: fasciculus retroflexus, MM: Medial Mammill, PAG: Periaqueductal gray, SNc: Substantia Nigra compacta, SNr: Substantia Nigra reticulata, VTA: Ventral Tegmental Area.

**Supplementary Table 1. Endocannabinoid levels in the VTA of extinguished mice with and without restraint stress.**

| Endocannabinoids | No Stress        | Stress           |
|------------------|------------------|------------------|
|                  | (pmol/g tissue)  |                  |
| 2-AG             | 422.95 ± 59.93   | 547.65 ± 42.73*  |
| 2-OG             | 1433.21 ± 371.87 | 2211.19 ± 320.80 |
| P-Gly            | 38.15 ± 3.78     | 44.13 ± 4.934    |
| PEA              | 197.99 ± 43.78   | 159.28 ± 19.44   |
| SEA              | 169.09 ± 22.16   | 177.09 ± 21.72   |
| OEA              | 124.85 ± 33.03   | 86.53 ± 10.11    |
| LEA              | 46.39 ± 14.15    | 37.83 ± 3.79     |

Mice were randomly divided into restrained and non-restrained groups. Both groups received the same cocaine-conditioning and extinction training in the CPP test. After extinction, the restrained, but not the non-restrained, group received a 30-min restraint stress. Brain tissue containing the VTA was quickly isolated after the restraint stress. Endocannabinoids were extracted and measured by LC/MS/MS as described in Methods. Data are presented as means ± SE. \* $p < 0.05$ ,  $n=8$  for each group.

2-AG, 2-arachidonyl glycerol; 2-OG, 2-oleoylglycerol; P-Gly, N-palmitoleoyl glycine; PEA, palmitoylethanolamine; SEA, stearoylethanolamine; OEA, oleoylethanolamine

and LEA, dihomog- $\gamma$ -linolenylethanolamine.

## Supplementary References

1. Paxinos G, Franklin K. *The Mouse Brain in Stereotaxic Coordinates (Deluxe Edition)*, Second edn. Academic Press, California, USA (2001).
